# Supplementary material for: Individualized homeopathic medicines and Urtica urens mother tincture in treatment of hyperuricemia: an open, randomized, pragmatic, pilot trial
Source: publisher site journal article supplement (doi:10.1515/jcim-2020-0129), 2020-10-20
Supplement: Supplementary file 1 [file j_jcim-2020-0129_suppl.pdf]

## Supplementary File - 1

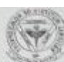

### NATIONAL INSTITUTE OF HOMOEOPATHY (An autonomous organization under the Ministry of AYUSH, Govt. of India)

Block-GE, Sector-III,  
Salt Lake, Kolkata- 700106  
Tel: 2337-0969/2337-5266  
Tele Fax: 2337-5295  
Email: admin@nih.nic.in  
Website: www.nih.nic.in

**Chairman**  
Dr. Samir Kumar Pal  
Professor, Chemical, Biological  
& Macromolecular Sciences  
S.N. Bose National Center for Basic  
Sciences, Block - JD, Sector - III,  
Salt Lake, Kolkata - 700106  
email: skpal@bose.res.in

**Member Secretary (Ex-Officio)**  
Prof. (Dr.) Gautam Ash  
Director In-Charge  
National Institute of Homoeopathy  
Kolkata

email: dr.gautam.ash@gmail.com  
**Member Convener (Ex-Officio)**  
Dr. Lokanath Behera

Lecturer, Academic In-Charge  
National Institute of Homoeopathy  
Kolkata

email: behera.lokanath@outlook.com

#### Members

**Prof. (Dr.) Dilip Panakkada**  
HOD, Dept. of Homoeopathic  
Pharmacy  
National Institute of Homoeopathy  
Kolkata

email: drdilippan@hotmail.com

**Dr. Subhas Singh**

Reader, Dept. of Organon of Medicine  
National Institute of Homoeopathy,  
Kolkata

email: drsubhas@rediffmail.com

**Sh. Hemendra Kumar Pandey**  
Scientific Officer RIBFG Group  
Govt. of India, Dept. of Atomic Energy  
Variable Energy Cyclotron Center  
(Bhaba Atomic Research Center)  
1/AF Bidhan Nagar, Kolkata - 700064

email: hkpandey@vecc.gov.in

**Dr. Shyamal Kumar Mukherjee**  
Principal, D.N. De Homoeopathic  
Medical College, 12, Gobind Khatik  
Road, Kolkata - 700046

email: shyamalimukherjee@gmail.com

**Sh. Adhir Kumar Das**

8/2A/1 Ujr Chaudhury Road,  
Kolkata - 700067

email: advocatadhirkdas@rediffmail.com

**Dr. Kajal Bhattacharya**

Reader, & HOD Dept. FMT,  
The Calcutta Homoeopathic Medical  
College, Director, Dept. of AYUSH,  
Govt of W.B.

email: drkajalb@gmail.com

**Prof. Dr. Satadal Das**

I/C Virology Unit CCRH

50, Rajendra Chatterjee Road,  
Kolkata - 700035

email: drsatadas@gmail.com

**Dr. Debabrata Sarkar (Hom)**

Scientist - IV, CCRH(I) An autonomous  
organisation, Ministry of AYUSH, Govt.  
of India, 50, Rajendra Chatterjee Road,  
Kolkata - 700035

email: drsarkardeb@gmail.com

**Sh. Raktim Das**

Chief Reporter, Daily Jugasankha

32/2, Phoolbagan, Kolkata - 700086

email: journalistraktim@gmail.com

**Sh. Amiya Sarkar**

242, S.K. Deb Road, Kolkata - 700048

email: amiyasarkar@yahoo.com

**Dr. Manabendra Sau**

Asst. Professor,  
Medinapore Medical College, 40A,  
Raja Dinendra Street, Kolkata -  
700009

email: msau2908@gmail.com

**Mrs. Chaitali Bhowmik**

Sparsh NGO

chaitalibhowmik@gmail.com

Ref. F. No. 5-23/NIH/PG/Ethical Comm. 2009/Vol 5/2671(A/S) Date: 10 April 2018  
To

**Dr. Chintamani Nayak;**

Lecturer, Dept. of Homoeopathic Materia Medica,  
National Institute of Homoeopathy,  
Kolkata - 700106

Ref Study: "Effectiveness of Individualized Homoeopathic Treatment and  
*Urtica Urens* Mother Tincture in treatment of Hyperuricemia: An open  
Randomized Pragmatic Trial" under the Guidance of Principal Investigator Dr.  
Chintamani Nayak; Lecturer, Dept. of Homoeopathic Materia Medica, NIH, Kolkata.

Dear Dr. Nayak,

The Institutional Ethical Committee of the National Institute of Homoeopathy,  
has in its meeting on 23<sup>rd</sup> March 2018 reviewed and discussed your study entitled  
"Effectiveness of Individualized Homoeopathic Treatment and *Urtica Urens*  
Mother Tincture in treatment of Hyperuricemia: An open Randomized  
Pragmatic Trial"

The following Members of the Ethical Committee were present in the meeting  
held on 23<sup>rd</sup> March 2018 at 11 AM in the Board Room of National Institute of  
Homoeopathy, Kolkata.

1. Dr. Samir Kumar Pal - Chairman - Basic Medical Science
2. Prof. Dr. Gautam Ash - Ex-Officio - Member Secretary
3. Dr. Lokanath Behera - Ex - Officio - Member Convener
4. Prof. (Dr.) Dilip Panakkada - Member - Subject Expert Person
5. Dr. Subhas Singh - Member - Clinician (Homoeopathy)
6. Sh. Hemendra Kumar Pandey - Member - Basic Medical Science (Invitee)
7. Dr. Shyamal Kumar Mukherjee - Member - Subject expert person
8. Sh. Adhir Kumar Das - Member - Legal Expert
9. Sh. Amiya Sarkar - Member - Lay person from the Community
10. Sh. Raktim Das - Member - Journalist
11. Dr. Manabendra Sau - Member - Basic Medical Science
12. Dr. Kajal Bhattacharya - Member - Subject Expert
13. Prof. Dr. Satadal Das - Member - Social Worker/Scientist
14. Dr. Debabrata Sarkar - Member - Clinical Homoeopathy
15. Mrs. Chaitali Bhowmik - Member - NGO (Sparsh)

The following documents were reviewed -

1. Protocol (Proposed Research Proposal)
2. Informed consent Document

The study being a non-regulatory, investigatory - initiated one, the Ethical  
Committee agreed to exempt from the audio-video recording of informed consent  
process. The written informed consent process shall however apply. The NIH-IEC should  
be informed about:

- a) The progress of the study every three months.
- b) Any serious adverse events occurring in the course of the study within 24  
hours of their occurrence.
- c) Any change in the protocol and patient information/ informed consent  
documents, prior to their implementation.
- d) The final report of the study shall have to be submitted to the NIH-IEC in  
all cases, even when the study is abandoned for any reason(s).

**The Institutional Ethical Committee has allowed the research proposal with the above  
mentioned points.**

Yours sincerely

Prof. (Dr.) S.K. Pal

Chairman, NIH-IEC

Institutional Ethical Committee

## Supplementary File - 2

CLINICAL TRIALS REGISTRY - INDIA

ICMR - National Institute of Medical Statistics

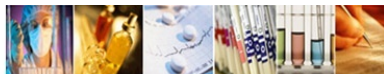

PDF of Trial

CTRI Website URL - <http://ctri.nic.in>

Clinical Trial Details (PDF Generation Date :- Tue, 13 Aug 2019 07:12:00 GMT)

|                                                                                            |                                                                                                                                                             |                                                                                                                                                          |
|--------------------------------------------------------------------------------------------|-------------------------------------------------------------------------------------------------------------------------------------------------------------|----------------------------------------------------------------------------------------------------------------------------------------------------------|
| <b>CTRI Number</b>                                                                         | CTRI/2018/05/014026 [Registered on: 21/05/2018] - <b>Trial Registered Prospectively</b>                                                                     |                                                                                                                                                          |
| <b>Last Modified On</b>                                                                    | 13/08/2019                                                                                                                                                  |                                                                                                                                                          |
| <b>Post Graduate Thesis</b>                                                                | Yes                                                                                                                                                         |                                                                                                                                                          |
| <b>Type of Trial</b>                                                                       | Interventional                                                                                                                                              |                                                                                                                                                          |
| <b>Type of Study</b>                                                                       | Homeopathy                                                                                                                                                  |                                                                                                                                                          |
| <b>Study Design</b>                                                                        | Randomized, Parallel Group, Multiple Arm Trial                                                                                                              |                                                                                                                                                          |
| <b>Public Title of Study</b>                                                               | Homoeopathic treatment of increased blood uric acid                                                                                                         |                                                                                                                                                          |
| <b>Scientific Title of Study</b>                                                           | Effectiveness of individualized homoeopathic treatment and Urtica urens mother tincture in treatment of hyperuricemia: an open, randomized, pragmatic trial |                                                                                                                                                          |
| <b>Secondary IDs if Any</b>                                                                | <b>Secondary ID</b>                                                                                                                                         | <b>Identifier</b>                                                                                                                                        |
|                                                                                            | U1111-1214-2300                                                                                                                                             | UTN                                                                                                                                                      |
| <b>Details of Principal Investigator or overall Trial Coordinator (multi-center study)</b> | <b>Details of Principal Investigator</b>                                                                                                                    |                                                                                                                                                          |
|                                                                                            | <b>Name</b>                                                                                                                                                 | Chintamani Nayak                                                                                                                                         |
|                                                                                            | <b>Designation</b>                                                                                                                                          | Lecturer                                                                                                                                                 |
|                                                                                            | <b>Affiliation</b>                                                                                                                                          | National Institute of Homoeopathy, Ministry of AYUSH, Govt. of India                                                                                     |
|                                                                                            | <b>Address</b>                                                                                                                                              | Department of Homoeopathic Materia Medica, OPD room no. 12 and 13, Block GE, Sector III, Salt Lake, Kolkata<br>Kolkata<br>WEST BENGAL<br>700106<br>India |
|                                                                                            | <b>Phone</b>                                                                                                                                                | 9433161854                                                                                                                                               |
|                                                                                            | <b>Fax</b>                                                                                                                                                  |                                                                                                                                                          |
|                                                                                            | <b>Email</b>                                                                                                                                                | drcnayak@gmail.com                                                                                                                                       |
| <b>Details Contact Person (Scientific Query)</b>                                           | <b>Details Contact Person (Scientific Query)</b>                                                                                                            |                                                                                                                                                          |
|                                                                                            | <b>Name</b>                                                                                                                                                 | Harcharanjeet Kaur                                                                                                                                       |
|                                                                                            | <b>Designation</b>                                                                                                                                          | Dean, Faculty of Homoeopathy                                                                                                                             |
|                                                                                            | <b>Affiliation</b>                                                                                                                                          | SGT University                                                                                                                                           |
|                                                                                            | <b>Address</b>                                                                                                                                              | Shree Guru Gobind Singh Tricentenary University, Gurugram<br>Gurgaon<br>HARYANA<br>122505<br>India                                                       |
|                                                                                            | <b>Phone</b>                                                                                                                                                | 9810018876                                                                                                                                               |
|                                                                                            | <b>Fax</b>                                                                                                                                                  |                                                                                                                                                          |
|                                                                                            | <b>Email</b>                                                                                                                                                | dr.harcharan@gmail.com                                                                                                                                   |
| <b>Details Contact Person (Public Query)</b>                                               | <b>Details Contact Person (Public Query)</b>                                                                                                                |                                                                                                                                                          |
|                                                                                            | <b>Name</b>                                                                                                                                                 | Harcharanjeet Kaur                                                                                                                                       |
|                                                                                            | <b>Designation</b>                                                                                                                                          | Dean, Faculty of Homoeopathy                                                                                                                             |
|                                                                                            | <b>Affiliation</b>                                                                                                                                          | SGT University                                                                                                                                           |
|                                                                                            | <b>Address</b>                                                                                                                                              | Shree Guru Gobind Singh Tricentenary University, Gurugram<br><br>HARYANA<br>122505<br>India                                                              |
|                                                                                            | <b>Phone</b>                                                                                                                                                | 9810018876                                                                                                                                               |
|                                                                                            | <b>Fax</b>                                                                                                                                                  |                                                                                                                                                          |
|                                                                                            | <b>Email</b>                                                                                                                                                | dr.harcharan@gmail.com                                                                                                                                   |

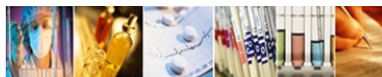

|                                               |                                                                                                                                |                                                                                                                         |                                                                                                                                                                                                                                                                                                                                                                                                                                                                                                                                                                                                                                                |                                         |
|-----------------------------------------------|--------------------------------------------------------------------------------------------------------------------------------|-------------------------------------------------------------------------------------------------------------------------|------------------------------------------------------------------------------------------------------------------------------------------------------------------------------------------------------------------------------------------------------------------------------------------------------------------------------------------------------------------------------------------------------------------------------------------------------------------------------------------------------------------------------------------------------------------------------------------------------------------------------------------------|-----------------------------------------|
| <b>Source of Monetary or Material Support</b> | <b>Source of Monetary or Material Support</b>                                                                                  |                                                                                                                         |                                                                                                                                                                                                                                                                                                                                                                                                                                                                                                                                                                                                                                                |                                         |
|                                               | > National Institute of Homoeopathy Ministry of AYUSH Govt of India Block GE, Sector 3, Salt Lake, Kolkata 700106, West Bengal |                                                                                                                         |                                                                                                                                                                                                                                                                                                                                                                                                                                                                                                                                                                                                                                                |                                         |
| <b>Primary Sponsor</b>                        | <b>Primary Sponsor Details</b>                                                                                                 |                                                                                                                         |                                                                                                                                                                                                                                                                                                                                                                                                                                                                                                                                                                                                                                                |                                         |
|                                               | <b>Name</b>                                                                                                                    | National Institute of Homoeopathy Ministry of AYUSH Govt of India                                                       |                                                                                                                                                                                                                                                                                                                                                                                                                                                                                                                                                                                                                                                |                                         |
|                                               | <b>Address</b>                                                                                                                 | Block GE, Sector III, Salt Lake, Kolkata, West Bengal 700106                                                            |                                                                                                                                                                                                                                                                                                                                                                                                                                                                                                                                                                                                                                                |                                         |
|                                               | <b>Type of Sponsor</b>                                                                                                         | Government medical college                                                                                              |                                                                                                                                                                                                                                                                                                                                                                                                                                                                                                                                                                                                                                                |                                         |
| <b>Details of Secondary Sponsor</b>           | <b>Name</b>                                                                                                                    | <b>Address</b>                                                                                                          |                                                                                                                                                                                                                                                                                                                                                                                                                                                                                                                                                                                                                                                |                                         |
|                                               | None                                                                                                                           | Nil                                                                                                                     |                                                                                                                                                                                                                                                                                                                                                                                                                                                                                                                                                                                                                                                |                                         |
| <b>Countries of Recruitment</b>               | <b>List of Countries</b>                                                                                                       |                                                                                                                         |                                                                                                                                                                                                                                                                                                                                                                                                                                                                                                                                                                                                                                                |                                         |
|                                               | India                                                                                                                          |                                                                                                                         |                                                                                                                                                                                                                                                                                                                                                                                                                                                                                                                                                                                                                                                |                                         |
| <b>Sites of Study</b>                         | <b>Name of Principal Investigator</b>                                                                                          | <b>Name of Site</b>                                                                                                     | <b>Site Address</b>                                                                                                                                                                                                                                                                                                                                                                                                                                                                                                                                                                                                                            | <b>Phone/Fax/Email</b>                  |
|                                               | Chintamani Nayak                                                                                                               | National Institute of Homoeopathy Ministry of AYUSH Govt of India                                                       | Dept of Homoeopathic Materia Medica, OPD room no. 13, Block GE, Sector III, Salt Lake, Kolkata<br>Kolkata<br>WEST BENGAL                                                                                                                                                                                                                                                                                                                                                                                                                                                                                                                       | 9433161854<br><br>drcnayak@gmail.com    |
| <b>Details of Ethics Committee</b>            | <b>Name of Committee</b>                                                                                                       | <b>Approval Status</b>                                                                                                  | <b>Date of Approval</b>                                                                                                                                                                                                                                                                                                                                                                                                                                                                                                                                                                                                                        | <b>Is Independent Ethics Committee?</b> |
|                                               | Institutional Ethical Committee of National Institute of Homoeopathy                                                           | Approved                                                                                                                | 10/04/2018                                                                                                                                                                                                                                                                                                                                                                                                                                                                                                                                                                                                                                     | No                                      |
| <b>Regulatory Clearance Status from DCGI</b>  | <b>Status</b>                                                                                                                  |                                                                                                                         | <b>Date</b>                                                                                                                                                                                                                                                                                                                                                                                                                                                                                                                                                                                                                                    |                                         |
|                                               | Not Applicable                                                                                                                 |                                                                                                                         | No Date Specified                                                                                                                                                                                                                                                                                                                                                                                                                                                                                                                                                                                                                              |                                         |
| <b>Health Condition / Problems Studied</b>    | <b>Health Type</b>                                                                                                             |                                                                                                                         | <b>Condition</b>                                                                                                                                                                                                                                                                                                                                                                                                                                                                                                                                                                                                                               |                                         |
|                                               | Patients                                                                                                                       |                                                                                                                         | Disorder of purine and pyrimidinemetabolism, unspecified                                                                                                                                                                                                                                                                                                                                                                                                                                                                                                                                                                                       |                                         |
| <b>Intervention / Comparator Agent</b>        | <b>Type</b>                                                                                                                    | <b>Name</b>                                                                                                             | <b>Details</b>                                                                                                                                                                                                                                                                                                                                                                                                                                                                                                                                                                                                                                 |                                         |
|                                               | Intervention                                                                                                                   | Individualized homeopathic medicines plus Urtica urens mother tincture plus lifestyle modifications and dietary advices | Indicated homeopathic medicines in centesimal or fifty millesimal potencies, as decided appropriate to the case or condition. In centesimal scale, each dose shall consist of a single drop of the indicated medicine (preserved in 90% v/v ethanol) in 5 ml of distilled water; dosage and repetition depending upon the individual requirement of the cases. In 50 millesimal scale, a single medicated cane sugar globule of poppy seed size (no. 10) shall be dissolved in 90 ml distilled water with addition of 2 drops of 90% v/v ethanol; 16 doses to be marked on the vial; each dose of 5 ml to be taken after 10 uniformly forceful |                                         |

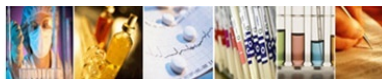

|                  |                                                                                                                              |                                                                                                                                                                                                                                                                                                                                                                                                                                                                                                                                                                                                                                                                                                                                                                                                                                                                                                                                                                                        |
|------------------|------------------------------------------------------------------------------------------------------------------------------|----------------------------------------------------------------------------------------------------------------------------------------------------------------------------------------------------------------------------------------------------------------------------------------------------------------------------------------------------------------------------------------------------------------------------------------------------------------------------------------------------------------------------------------------------------------------------------------------------------------------------------------------------------------------------------------------------------------------------------------------------------------------------------------------------------------------------------------------------------------------------------------------------------------------------------------------------------------------------------------|
|                  |                                                                                                                              | <p>downward strokes to the vial in 45 ml normal water in a clean cup, to stir well, to take 5 ml of this liquid orally, and to discard rest of the liquid from the cup. Along with this, <i>Urtica urens</i> mother tincture shall be administered in personalized dosage (10-20 drops once-thrice daily in 30 ml of normal water); be taken orally on clean tongue with empty stomach. Lifestyle modification will be advised in terms of encouraging to have lacto-vegetarian diet, restriction or moderation of high purine content food, e.g. meat, fish, poultry, organ meat, oyster, sea food, yeast and yeast extracts, cauliflower, mushroom, lentils, spinach, beans, peas etc., moderation of alcohol consumption, adequate fluids (2 lit/day), hot or cold compress over the affected joint, rest in bed and immobilization of the affected joint in acute gout, moderate exercise, physiotherapy, and counselling and patient education. Duration of therapy: 6 months</p> |
| Comparator Agent | Indicated homeopathic medicines in centesimal or fifty millesimal potencies plus lifestyle modifications and dietary advices | <p>Indicated homeopathic medicines in centesimal or fifty millesimal potencies, as decided appropriate to the case or condition. In centesimal scale, each dose shall consist of a single drop of the indicated medicine (preserved in 90% v/v ethanol) in 5 ml of distilled water; dosage and repetition depending upon the individual requirement of the cases. In 50 millesimal scale, a single medicated cane sugar globule of poppy seed size (no. 10) shall be dissolved in 90 ml distilled water with addition of 2 drops of 90% v/v ethanol; 16 doses to be marked on the vial; each dose of 5 ml to be taken after 10 uniformly forceful downward strokes to the vial in 45 ml normal water in a clean cup, to stir well, to take 5 ml of this liquid orally, and to discard rest of the liquid from the cup. be taken orally on clean tongue with empty stomach. Lifestyle modification will be advised in</p>                                                               |

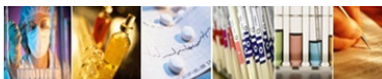

|                  |                                                                               |                                                                                                                                                                                                                                                                                                                                                                                                                                                                                                                                                                                                                                                                                                                                                                                       |
|------------------|-------------------------------------------------------------------------------|---------------------------------------------------------------------------------------------------------------------------------------------------------------------------------------------------------------------------------------------------------------------------------------------------------------------------------------------------------------------------------------------------------------------------------------------------------------------------------------------------------------------------------------------------------------------------------------------------------------------------------------------------------------------------------------------------------------------------------------------------------------------------------------|
|                  |                                                                               | terms of encouraging to have lacto-vegetarian diet, restriction or moderation of high purine content food, e.g. meat, fish, poultry, organ meat, oyster, sea food, yeast and yeast extracts, cauliflower, mushroom, lentils, spinach, beans, peas etc., moderation of alcohol consumption, adequate fluids (2 lit/day), hot or cold compress over the affected joint, rest in bed and immobilization of the affected joint in acute gout, moderate exercise, physiotherapy, and counselling and patient education. Duration of therapy: 6 months                                                                                                                                                                                                                                      |
| Comparator Agent | Urtica urens mother tincture plus lifestyle modifications and dietary advices | Urtica urens mother tincture shall be administered in personalized dosage (10-20 drops once-thrice daily in 30 ml of normal water); to be taken orally on clean tongue with empty stomach. Lifestyle modification will be advised in terms of encouraging to have lacto-vegetarian diet, restriction or moderation of high purine content food, e.g. meat, fish, poultry, organ meat, oyster, sea food, yeast and yeast extracts, cauliflower, mushroom, lentils, spinach, beans, peas etc., moderation of alcohol consumption, adequate fluids (2 lit/day), hot or cold compress over the affected joint, rest in bed and immobilization of the affected joint in acute gout, moderate exercise, physiotherapy, and counselling and patient education. Duration of therapy: 6 months |

**Inclusion Criteria**

| Inclusion Criteria |                                                                                                                                                                                                                                                                                                               |
|--------------------|---------------------------------------------------------------------------------------------------------------------------------------------------------------------------------------------------------------------------------------------------------------------------------------------------------------|
| <b>Age From</b>    | 18.00 Year(s)                                                                                                                                                                                                                                                                                                 |
| <b>Age To</b>      | 65.00 Year(s)                                                                                                                                                                                                                                                                                                 |
| <b>Gender</b>      | Both                                                                                                                                                                                                                                                                                                          |
| <b>Details</b>     | 1. Patients suffering from hyperuricemia, with or without gout<br>2. Age between 18 and 65 years<br>3. Patients with known but controlled systemic diseases with medication<br>4. Patients giving written consent to participate in the study<br>5. Literate patients; ability to read Bengali and/or English |

**Exclusion Criteria**

| Exclusion Criteria |                                                                                                                         |
|--------------------|-------------------------------------------------------------------------------------------------------------------------|
| <b>Details</b>     | 1. Secondary gout<br>2. Severe or advanced cases requiring surgical procedures or orthopedic corrections of deformities |





|                                                                             | <ul style="list-style-type: none"> <li>3. Patients with psychiatric diseases</li> <li>4. Cases suffering from uncontrolled systemic illness or life-threatening infections or any vital organ failure</li> <li>5. Cases already undergoing homoeopathic treatment for any chronic disease</li> <li>6. Substance abuse and/or dependence</li> <li>7. Pregnant women and lactating mothers</li> </ul>                                                                                                                                                                                                                                                                                                                                                                                                                                                                                                                                                                                                                                                                                                                                                                                                                                                                                                                                                                              |         |            |                                                                   |                              |                                                                             |                              |
|-----------------------------------------------------------------------------|----------------------------------------------------------------------------------------------------------------------------------------------------------------------------------------------------------------------------------------------------------------------------------------------------------------------------------------------------------------------------------------------------------------------------------------------------------------------------------------------------------------------------------------------------------------------------------------------------------------------------------------------------------------------------------------------------------------------------------------------------------------------------------------------------------------------------------------------------------------------------------------------------------------------------------------------------------------------------------------------------------------------------------------------------------------------------------------------------------------------------------------------------------------------------------------------------------------------------------------------------------------------------------------------------------------------------------------------------------------------------------|---------|------------|-------------------------------------------------------------------|------------------------------|-----------------------------------------------------------------------------|------------------------------|
| <b>Method of Generating Random Sequence</b>                                 | Permuted block randomization, fixed                                                                                                                                                                                                                                                                                                                                                                                                                                                                                                                                                                                                                                                                                                                                                                                                                                                                                                                                                                                                                                                                                                                                                                                                                                                                                                                                              |         |            |                                                                   |                              |                                                                             |                              |
| <b>Method of Concealment</b>                                                | An Open list of random numbers                                                                                                                                                                                                                                                                                                                                                                                                                                                                                                                                                                                                                                                                                                                                                                                                                                                                                                                                                                                                                                                                                                                                                                                                                                                                                                                                                   |         |            |                                                                   |                              |                                                                             |                              |
| <b>Blinding/Masking</b>                                                     | Open Label                                                                                                                                                                                                                                                                                                                                                                                                                                                                                                                                                                                                                                                                                                                                                                                                                                                                                                                                                                                                                                                                                                                                                                                                                                                                                                                                                                       |         |            |                                                                   |                              |                                                                             |                              |
| <b>Primary Outcome</b>                                                      | <table> <tr> <th>Outcome</th><th>Timepoints</th></tr> <tr> <td>Serum uric acid level</td><td>Baseline, 3 months, 6 months</td></tr> </table>                                                                                                                                                                                                                                                                                                                                                                                                                                                                                                                                                                                                                                                                                                                                                                                                                                                                                                                                                                                                                                                                                                                                                                                                                                     | Outcome | Timepoints | Serum uric acid level                                             | Baseline, 3 months, 6 months |                                                                             |                              |
| Outcome                                                                     | Timepoints                                                                                                                                                                                                                                                                                                                                                                                                                                                                                                                                                                                                                                                                                                                                                                                                                                                                                                                                                                                                                                                                                                                                                                                                                                                                                                                                                                       |         |            |                                                                   |                              |                                                                             |                              |
| Serum uric acid level                                                       | Baseline, 3 months, 6 months                                                                                                                                                                                                                                                                                                                                                                                                                                                                                                                                                                                                                                                                                                                                                                                                                                                                                                                                                                                                                                                                                                                                                                                                                                                                                                                                                     |         |            |                                                                   |                              |                                                                             |                              |
| <b>Secondary Outcome</b>                                                    | <table> <tr> <th>Outcome</th><th>Timepoints</th></tr> <tr> <td>Gout Assessment Questionnaire 2 (GAQ2) translated Bengali version</td><td>Baseline, 3 months, 6 months</td></tr> <tr> <td>Measure Yourself Medical Outcome Profile (MYMOP) translated Bengali version</td><td>Baseline, 3 months, 6 months</td></tr> </table>                                                                                                                                                                                                                                                                                                                                                                                                                                                                                                                                                                                                                                                                                                                                                                                                                                                                                                                                                                                                                                                     | Outcome | Timepoints | Gout Assessment Questionnaire 2 (GAQ2) translated Bengali version | Baseline, 3 months, 6 months | Measure Yourself Medical Outcome Profile (MYMOP) translated Bengali version | Baseline, 3 months, 6 months |
| Outcome                                                                     | Timepoints                                                                                                                                                                                                                                                                                                                                                                                                                                                                                                                                                                                                                                                                                                                                                                                                                                                                                                                                                                                                                                                                                                                                                                                                                                                                                                                                                                       |         |            |                                                                   |                              |                                                                             |                              |
| Gout Assessment Questionnaire 2 (GAQ2) translated Bengali version           | Baseline, 3 months, 6 months                                                                                                                                                                                                                                                                                                                                                                                                                                                                                                                                                                                                                                                                                                                                                                                                                                                                                                                                                                                                                                                                                                                                                                                                                                                                                                                                                     |         |            |                                                                   |                              |                                                                             |                              |
| Measure Yourself Medical Outcome Profile (MYMOP) translated Bengali version | Baseline, 3 months, 6 months                                                                                                                                                                                                                                                                                                                                                                                                                                                                                                                                                                                                                                                                                                                                                                                                                                                                                                                                                                                                                                                                                                                                                                                                                                                                                                                                                     |         |            |                                                                   |                              |                                                                             |                              |
| <b>Target Sample Size</b>                                                   | <b>Total Sample Size=90</b><br><b>Sample Size from India=90</b><br><b>Final Enrollment numbers achieved (Total)=90</b><br><b>Final Enrollment numbers achieved (India)=90</b>                                                                                                                                                                                                                                                                                                                                                                                                                                                                                                                                                                                                                                                                                                                                                                                                                                                                                                                                                                                                                                                                                                                                                                                                    |         |            |                                                                   |                              |                                                                             |                              |
| <b>Phase of Trial</b>                                                       | Phase 2/ Phase 3                                                                                                                                                                                                                                                                                                                                                                                                                                                                                                                                                                                                                                                                                                                                                                                                                                                                                                                                                                                                                                                                                                                                                                                                                                                                                                                                                                 |         |            |                                                                   |                              |                                                                             |                              |
| <b>Date of First Enrollment (India)</b>                                     | 28/05/2018                                                                                                                                                                                                                                                                                                                                                                                                                                                                                                                                                                                                                                                                                                                                                                                                                                                                                                                                                                                                                                                                                                                                                                                                                                                                                                                                                                       |         |            |                                                                   |                              |                                                                             |                              |
| <b>Date of First Enrollment (Global)</b>                                    | No Date Specified                                                                                                                                                                                                                                                                                                                                                                                                                                                                                                                                                                                                                                                                                                                                                                                                                                                                                                                                                                                                                                                                                                                                                                                                                                                                                                                                                                |         |            |                                                                   |                              |                                                                             |                              |
| <b>Estimated Duration of Trial</b>                                          | <b>Years=1</b><br><b>Months=0</b><br><b>Days=0</b>                                                                                                                                                                                                                                                                                                                                                                                                                                                                                                                                                                                                                                                                                                                                                                                                                                                                                                                                                                                                                                                                                                                                                                                                                                                                                                                               |         |            |                                                                   |                              |                                                                             |                              |
| <b>Recruitment Status of Trial (Global)</b>                                 | Not Applicable                                                                                                                                                                                                                                                                                                                                                                                                                                                                                                                                                                                                                                                                                                                                                                                                                                                                                                                                                                                                                                                                                                                                                                                                                                                                                                                                                                   |         |            |                                                                   |                              |                                                                             |                              |
| <b>Recruitment Status of Trial (India)</b>                                  | Completed                                                                                                                                                                                                                                                                                                                                                                                                                                                                                                                                                                                                                                                                                                                                                                                                                                                                                                                                                                                                                                                                                                                                                                                                                                                                                                                                                                        |         |            |                                                                   |                              |                                                                             |                              |
| <b>Publication Details</b>                                                  | None yet; to be published                                                                                                                                                                                                                                                                                                                                                                                                                                                                                                                                                                                                                                                                                                                                                                                                                                                                                                                                                                                                                                                                                                                                                                                                                                                                                                                                                        |         |            |                                                                   |                              |                                                                             |                              |
| <b>Brief Summary</b>                                                        | <p>Gout, resulting from an inborn error of purine metabolism, manifests as a spectrum of clinical and pathologic features on a foundation of excess body burden of uric acid (overproduction of purine – primary gout; and/or overproduction and under-excretion of urate), manifested in part by hyperuricemia (serum urate greater than either 6.8 or 7.0 mg/dL) and frequently complicated by hypertension, obesity, dyslipidemia, metabolic syndrome, type 2 diabetes, renal calculus, and chronic kidney disease (CKD). Typically, the disease first presents as arthritis that is acute and episodic, but can become recurrent in the majority of individuals. Tophi, mainly in articular, periarticular, bursal, bone, auricular, and cutaneous tissues is a pathognomonic feature of gout, and are detectable by physical exam, and/or by imaging approaches and pathology examination. In the past few decades, gout has increased not only in incidence and prevalence, but also in clinical complexity, the latter accentuated in part by a dearth of novel advances in treatments for hyperuricemia and gouty arthritis. Epidemiologic studies indicate that the quality of gout management has remained suboptimal owing to both patient and physician issues. Urate-lowering therapy – allopurinol, probenecid, and recently, febuxostat, remains the mainstay</p> |         |            |                                                                   |                              |                                                                             |                              |



of treatment in spite of having certain unavoidable toxicities and limitations. Complementary and Alternative Medicine (CAM) therapies like acupuncture, herbal extracts and formulations, injections of dilute formic acid, traditional Chinese medicine and diet therapy, Unani medicine and homoeopathy have, but limited research evidences in treatment of hyperuricemia and/or gout. Though traditionally being claimed as highly efficacious in treating such conditions, homoeopathy research in hyperuricemia remains seriously compromised. In this prospective, open-label, randomized, three parallel arms, pragmatic clinical trial, the investigators intend to explore whether individualized homoeopathic (IH) treatment, *Urtica urens* mother tincture (UUMT), and both (i.e. IH + UUMT) have any significantly different effect in treatment of hyperuricemia. Following preliminary and detailed screening using specified selection (inclusion and exclusion) criteria, 90 eligible patients will be recruited in the trial. Following that, baseline outcome data (serum uric acid, GAQ2 scores and MYMOP scores) will be obtained and the patients will be randomized either of the three trial arms in 1:1:1 ratio and will be assessed at baseline, after 3 months and 6 months. Comparative analysis will be carried out in the end to detect group differences, if any. Results will be published in scientific journals.

## Supplementary File - 3

### REVISED GOUT IMPACT (GI) SECTION OF GAQ<sub>2.0</sub>

Reprinted with permission. Copyright © 2008 Takeda Global Research & Development Inc.

Please answer every question. Read every question carefully and choose the best answer for you.

Questions may be answered by filling in a bubble to indicate your choice.

Some questions in this survey are about your gout overall and some are about only the times you are experiencing pain or swelling of your joints due to your gout. Two important terms are used in this survey:

**Gout Attack** = time when you are experiencing pain or swelling of your joints because of gout. When a question is about a Gout Attack please only think about what it is like for you when you have joint pain or swelling because of your gout.

**Gout Overall** = times you have a Gout Attack AND the time Between Attacks when you do not have joint pain or swelling because of gout.

#### ABOUT HOW GOUT AFFECTS YOUR DAILY LIFE OVERALL

1. Please indicate how much you agree or disagree with each of the statements below.

(Mark one answer for each statement.)

|                                                                                                       | Strongly Agree        | Agree                 | Not Certain           | Disagree              | Strongly Disagree     |
|-------------------------------------------------------------------------------------------------------|-----------------------|-----------------------|-----------------------|-----------------------|-----------------------|
| a. I am worried that I will have a gout attack within the next year.                                  | <input type="radio"/> |
| b. I am afraid that my gout will get worse over time.                                                 | <input type="radio"/> |
| c. I feel anxious that my gout will interfere with my future activities.                              | <input type="radio"/> |
| d. I worry that I will not be able to continue to enjoy my leisure activities as a result of my gout. | <input type="radio"/> |
| e. I am bothered by side effects from my gout medications.                                            | <input type="radio"/> |
| f. I am mad or angry when I experience a gout attack.                                                 | <input type="radio"/> |
| g. It is difficult to plan ahead for events or activities because I may have a gout attack.           | <input type="radio"/> |
| h. I feel depressed when I experience a gout attack.                                                  | <input type="radio"/> |
| i. My current medications are effective for treating a gout attack when I have one.                   | <input type="radio"/> |
| j. I miss planned or important activities when I have a gout attack.                                  | <input type="radio"/> |
| k. I worry about long term effects of gout medications.                                               | <input type="radio"/> |
| l. My current medications do not work well to prevent gout attacks from happening.                    | <input type="radio"/> |
| m. I have control over my gout.                                                                       | <input type="radio"/> |

2. During your last gout attack, how much of the time did you experience the following?

(Mark one answer for each statement.)

|                                                                                                                            | All of the Time (100%) | Most of the Time (about 50%) | Some of the Time (about 50%) | A Little of the Time  | None of the Time (0%) |
|----------------------------------------------------------------------------------------------------------------------------|------------------------|------------------------------|------------------------------|-----------------------|-----------------------|
| a. Miss work because of your gout symptoms?                                                                                | <input type="radio"/>  | <input type="radio"/>        | <input type="radio"/>        | <input type="radio"/> | <input type="radio"/> |
| b. Have difficulty working because of your gout symptoms?                                                                  | <input type="radio"/>  | <input type="radio"/>        | <input type="radio"/>        | <input type="radio"/> | <input type="radio"/> |
| c. Have difficulty with recreational or social activities because of your gout symptoms?                                   | <input type="radio"/>  | <input type="radio"/>        | <input type="radio"/>        | <input type="radio"/> | <input type="radio"/> |
| d. Have difficulty with self care activities such as feeding, bathing, or dressing yourself because of your gout symptoms? | <input type="radio"/>  | <input type="radio"/>        | <input type="radio"/>        | <input type="radio"/> | <input type="radio"/> |

During your last gout attack, how much did your symptoms interfere with the following things? (Mark one answer for each statement.)

|                                                                           | Not a Bit             | A Little Bit          | Moderately            | Quite a Bit           | Extremely             |
|---------------------------------------------------------------------------|-----------------------|-----------------------|-----------------------|-----------------------|-----------------------|
| a. Your mood?                                                             | <input type="radio"/> |
| b. Your ability to move about?                                            | <input type="radio"/> |
| c. Your sleep?                                                            | <input type="radio"/> |
| d. Your normal work? (including both work outside the home and housework) | <input type="radio"/> |
| e. Your recreational activities?                                          | <input type="radio"/> |
| f. Your enjoyment of life?                                                | <input type="radio"/> |
| g. Your ability to do what you want to do?                                | <input type="radio"/> |

Scales and items: Gout concern overall (4 items, 1 a-d); Gout medication side effects (2 items, 1 e & k); Unmet gout treatment need (3 items, 1 i,l,m); Well being during attack (11 items, 2 a-d 3 a-g); Gout concern during attack (4 items, 1 f,g,h,j)



## Supplementary File - 4

# Gout Assessment Questionnaire: গাউট (গেঁটেবাত) পরিমাপক প্রশ্নাবলী

[অনুবাদিত বাংলা সংস্করণ]

রোগীর নাম:

রেজিস্ট্রেশন নং:

তারিখ:

**নিদেশিকা:** যে সকল রোগীদের রক্তে ইউরিক অ্যাসিডের পরিমাণ বেশি থাকে ও গাউটে (এক ধরনের গেঁটেবাত) ভোগেন, তাঁদের নিম্নলিখিত উপসর্গগুলি দেখা যায়। কিছু প্রশ্ন সামগ্রিকভাবে আপনার উপরে রোগটির প্রভাব (Gout overall) জানতে চাইবে। আবার কিছু প্রশ্ন শুধুমাত্র যে সময়ে আপনার গাঁটগুলিতে (অস্থিসন্ধি) ফোলা বা ব্যথা অনুভব করেন (Gout attack), সেই তীব্রতা সম্পর্কিত। আপনার ক্ষেত্রে এই রোগলক্ষণগুলির যথার্থতার কথা মনে রেখে প্রত্যেক প্রশ্নের সঙ্গে দেওয়া উপযুক্ত যে কোনো একটি বক্সে টিক চিহ্ন দিয়ে আপনার উত্তরটি জানান।

### আপনার প্রাত্যহিক জীবনযাপনে গাউটের প্রভাব:

**নিদেশিকা:** নিম্নলিখিত বক্তব্যগুলির সঙ্গে আপনি কতটা সহমত, তা উপযুক্ত বক্সে টিক চিহ্ন দিয়ে জানান। কোনো বক্তব্য আপনার ক্ষেত্রে প্রযোজ্য না হলে অপ্রাসঙ্গিক বক্সে টিক দিন।

| উপসর্গসমূহ                                                                                         | প্রবলভাবে<br>সম্মত       | সম্মত                    | অনিশ্চিত                 | অসম্মত                   | প্রবলভাবে<br>অসম্মত      | অপ্রাসঙ্গিক              |
|----------------------------------------------------------------------------------------------------|--------------------------|--------------------------|--------------------------|--------------------------|--------------------------|--------------------------|
| ১. আমার দুশ্চিন্তা হয় যে আগামী বছরের মধ্যেই আমার গাঁটগুলি আবার ফুলে উঠবে ও ব্যথা হবে              | <input type="checkbox"/> |
| ২. আমার ভয় হয় যে সময়ের সঙ্গে আমার গেঁটেবাত আরও বেড়ে যাবে                                       | <input type="checkbox"/> |
| ৩. গেঁটেবাতের কারণে ভবিষ্যতে আমার কাজকর্ম করতে অসুবিধা হবে বলে আশঙ্কা হয়                          | <input type="checkbox"/> |
| ৪. আমার দুশ্চিন্তা হয় যে এই গেঁটেবাতের কারণে আমি অবসরকালীন কাজকর্মগুলি উপভোগ করতে পারবো না        | <input type="checkbox"/> |
| ৫. আমি গেঁটেবাতের ওষুধের পার্শ্বপ্রতিক্রিয়ায় বিব্রত বোধ করছি                                     | <input type="checkbox"/> |
| ৬. যখন আমার গাঁটগুলি ফুলে ওঠে ও ব্যথা হয়, আমি প্রায় ক্ষিপ্ত হয়ে উঠি                             | <input type="checkbox"/> |
| ৭. আমার গাঁটগুলি ফুলতে পারে ও ব্যথা হতে পারে এই ভয়ে আমার কোনো কাজকর্মের পরিকল্পনা করতে সমস্যা হয় | <input type="checkbox"/> |
| ৮. যখন আমার গাঁটগুলি ফুলে ওঠে ও ব্যথা হয়, আমি হতাশ বোধ করি                                        | <input type="checkbox"/> |
| ৯. যখন আমার গাঁটগুলি ফুলে ওঠে ও ব্যথা হয়, বর্তমানে চলাকালীন ওষুধগুলি সেই অবস্থায় কার্যকরী        | <input type="checkbox"/> |
| ১০. যখন আমার গাঁটগুলি ফুলে ওঠে ও ব্যথা হয়, আমাকে পরিকল্পিত বা গুরুত্বপূর্ণ কাজগুলি বাতিল করতে হয় | <input type="checkbox"/> |
| ১১. আমার গেঁটেবাতের ওষুধের দীর্ঘমেয়াদী প্রভাবের কথা ভেবে দুশ্চিন্তা হয়                           | <input type="checkbox"/> |
| ১২. আমার বর্তমান ওষুধগুলি রোগটির নতুনভাবে হওয়াকে ভালোভাবে আটকাতে পারছে না                         | <input type="checkbox"/> |
| ১৩. আমার গেঁটেবাত সবমিলিয়ে নিয়ন্ত্রিত                                                            | <input type="checkbox"/> |

**নির্দেশিকা:** শেষবার যখন আপনার গাঁটগুলি ফুলে উঠেছিল ও ব্যথা হয়েছিল, কতটা সময় আপনি নিম্নলিখিত সমস্যাগুলি অনুভব করেছিলেন, তা উপযুক্ত বক্সে টিক চিহ্ন দিয়ে জানান।

| উপসর্গসমূহ                                                                        | সকল সময়                 | বেশিরভাগ সময়            | অর্ধেক সময়              | অল্প সময়                | কখনোই না                 |
|-----------------------------------------------------------------------------------|--------------------------|--------------------------|--------------------------|--------------------------|--------------------------|
| ১. গাউটের কষ্টের জন্যে কাজ বন্ধ রাখতে হয়েছে                                      | <input type="checkbox"/> |
| ২. গাউটের কষ্টের জন্যে কাজ করতে কষ্ট হয়েছে                                       | <input type="checkbox"/> |
| ৩. বিনোদনমূলক বা সামাজিক কাজকর্মে কষ্ট হয়েছে                                     | <input type="checkbox"/> |
| ৪. ব্যক্তিগত কাজকর্মে (যেমন খাওয়াদাওয়া, স্নান করা, জামাকাপড় পড়া) বাধা পেয়েছি | <input type="checkbox"/> |

**নির্দেশিকা:** শেষবার যখন আপনার গাঁটগুলি ফুলে উঠেছিল ও ব্যথা হয়েছিল, নিম্নলিখিত বিষয়গুলিতে তা কতটা বাধা দিয়েছিল, উপযুক্ত বক্সে টিক চিহ্ন দিয়ে জানান।

| বিষয়সমূহ                                         | সামান্যও না              | খুব অল্প                 | মোটামুটি                 | বেশ কিছুটা               | খুব বেশি                 |
|---------------------------------------------------|--------------------------|--------------------------|--------------------------|--------------------------|--------------------------|
| ১. আপনার মেজাজ                                    | <input type="checkbox"/> |
| ২. আপনার চলাফেরা করার ক্ষমতা                      | <input type="checkbox"/> |
| ৩. আপনার ঘুম                                      | <input type="checkbox"/> |
| ৪. আপনার স্বাভাবিক কাজকর্ম (ঘরোয়া বা বাইরের কাজ) | <input type="checkbox"/> |
| ৫. আপনার বিনোদনমূলক কাজকর্ম                       | <input type="checkbox"/> |
| ৬. আপনার জীবনের উপভোগ্যতা                         | <input type="checkbox"/> |
| ৭. আপনি যা চাইছেন তা করার ক্ষমতা                  | <input type="checkbox"/> |

অংশগ্রহণের জন্যে ধন্যবাদ । অনুগ্রহ করে দেখে নিন যে প্রত্যেক প্রশ্নের উত্তর দিয়েছেন কিনা ।

.....

রোগীর স্বাক্ষর

.....

ডাক্তারের স্বাক্ষর

## Supplementary File - 5

### \* MYMOP2 \*

Full name ..... Date of birth .....

Address and postcode.....

Today's date ..... Practitioner seen .....

Choose one or two symptoms (physical or mental) which bother you the most. Write them on the lines.

Now consider how bad each symptom is, over the last week, and score it by circling your chosen number.

SYMPTOM 1: ..... 0 1 2 3 4 5 6  
..... As good as it could be ..... As bad as it could be  
.....

SYMPTOM 2: ..... 0 1 2 3 4 5 6  
..... As good as it could be ..... As bad as it could be  
.....

Now choose one activity (physical, social or mental) that is important to you, and that your problem makes difficult or prevents you doing. Score how bad it has been in the last week.

ACTIVITY: ..... 0 1 2 3 4 5 6  
..... As good as it could be ..... As bad as it could be  
.....

Lastly how would you rate your general feeling of wellbeing during the last week?

0 1 2 3 4 5 6  
As good as it could be ..... As bad as it could be

How long have you had Symptom 1, either all the time or on and off? Please circle:

0 - 4 weeks    4 - 12 weeks    3 months - 1 year    1 - 5 years    over 5 years

Are you taking any medication FOR THIS PROBLEM? Please circle: YES/NO

#### IF YES:

1. Please write in name of medication, and how much a day/week

.....

2. Is cutting down this medication: Please circle:

Not important    a bit important    very important    not applicable

#### IF NO:

Is avoiding medication for this problem:

Not important    a bit important    very important    not applicable

**\* MYMOP2 Follow up \***

Full name ..... Today's date .....

Please circle the number to show how severe your problem has been IN THE LAST WEEK.

This should be YOUR opinion, no-one else's!

|                  |                        |   |   |   |   |                       |   |
|------------------|------------------------|---|---|---|---|-----------------------|---|
| SYMPTOM 1: ..... | 0                      | 1 | 2 | 3 | 4 | 5                     | 6 |
| .....            | As good as it could be |   |   |   |   | As bad as it could be |   |
| .....            |                        |   |   |   |   |                       |   |

|                  |                        |   |   |   |   |                       |   |
|------------------|------------------------|---|---|---|---|-----------------------|---|
| SYMPTOM 2: ..... | 0                      | 1 | 2 | 3 | 4 | 5                     | 6 |
| .....            | As good as it could be |   |   |   |   | As bad as it could be |   |
| .....            |                        |   |   |   |   |                       |   |

|                 |                        |   |   |   |   |                       |   |
|-----------------|------------------------|---|---|---|---|-----------------------|---|
| ACTIVITY: ..... | 0                      | 1 | 2 | 3 | 4 | 5                     | 6 |
| .....           | As good as it could be |   |   |   |   | As bad as it could be |   |
| .....           |                        |   |   |   |   |                       |   |

|                                                       |                        |   |   |   |   |                       |   |
|-------------------------------------------------------|------------------------|---|---|---|---|-----------------------|---|
| WELLBEING:                                            | 0                      | 1 | 2 | 3 | 4 | 5                     | 6 |
| How would you rate your general feeling of wellbeing? | As good as it could be |   |   |   |   | As bad as it could be |   |

If an important new symptom has appeared please describe it and mark how bad it is below.

Otherwise do not use this line.

|                  |                        |   |   |   |   |                       |   |
|------------------|------------------------|---|---|---|---|-----------------------|---|
| SYMPTOM 3: ..... | 0                      | 1 | 2 | 3 | 4 | 5                     | 6 |
| .....            | As good as it could be |   |   |   |   | As bad as it could be |   |
| .....            |                        |   |   |   |   |                       |   |

The treatment you are receiving may not be the only thing affecting your problem. If there is anything else that you think is important, such as changes you have made yourself, or other things happening in your life, please write it here (write overleaf if you need more space):

Are you taking medication FOR THIS PROBLEM ? Please circle: YES/NO

IF YES:

Please write in name of medication, and how much a day / week

.....  
 .....



## Supplementary File - 6

### MYMOP-2 (Initial) Bengali version

রোগীর নাম:

বয়স:

রেজিস্ট্রেশন নং:

তারিখ:

**নির্দেশিকা** একটি বা দুটি উপসর্গ বা রোগলক্ষণ (শারীরিক বা মানসিক) বেছে নিন যা আপনাকে সবথেকে বেশি কষ্ট দিচ্ছে। ধারণা করুন যে গত সপ্তাহে প্রতিটি সমস্যার তীব্রতা কতটা ছিল এবং উপযুক্ত সংখ্যায় গোল দাগ দিয়ে তা নির্দেশ করুন।

|           |             |   |   |              |   |   |   |
|-----------|-------------|---|---|--------------|---|---|---|
| উপসর্গ ১: | ০           | ১ | ২ | ৩            | ৪ | ৫ | ৬ |
| .....     | সবথেকে ভালো |   |   | সবথেকে খারাপ |   |   |   |
| .....     | যা হতে পারে |   |   | যা হতে পারে  |   |   |   |
|           |             |   |   |              |   |   |   |
| উপসর্গ ২: | ০           | ১ | ২ | ৩            | ৪ | ৫ | ৬ |
| .....     | সবথেকে ভালো |   |   | সবথেকে খারাপ |   |   |   |
| .....     | যা হতে পারে |   |   | যা হতে পারে  |   |   |   |

**নির্দেশিকা** এইবারে যে কোনো একটি কাজকর্ম (শারীরিক, সামাজিক, বা মানসিক) বেছে নিন যেটি আপনার কাছে গুরুত্বপূর্ণ এবং রোগের কারণে আপনি তা করতে পারছেন না বা করতে কষ্ট হচ্ছে।

|          |             |   |   |              |   |   |   |
|----------|-------------|---|---|--------------|---|---|---|
| কাজকর্ম: | ০           | ১ | ২ | ৩            | ৪ | ৫ | ৬ |
| .....    | সবথেকে ভালো |   |   | সবথেকে খারাপ |   |   |   |
| .....    | যা হতে পারে |   |   | যা হতে পারে  |   |   |   |

সবমিলিয়ে আপনি গত সপ্তাহে আপনার সার্বিকভাবে ভালো থাকার অনুভূতিকে কিভাবে বর্ণনা করবেন, তা উপযুক্ত সংখ্যায় গোল দাগ দিয়ে নির্দেশ করুন।

|             |   |   |              |   |   |   |
|-------------|---|---|--------------|---|---|---|
| ০           | ১ | ২ | ৩            | ৪ | ৫ | ৬ |
| সবথেকে ভালো |   |   | সবথেকে খারাপ |   |   |   |
| যা হতে পারে |   |   | যা হতে পারে  |   |   |   |

কত দিন ধরে আপনি প্রথম উপসর্গটিতে ভুগছেন (সকল সময় বা মাঝেমধ্যে)?

০ - ৪ সপ্তাহ ☐      ৪ - ১২ সপ্তাহ ☐      ৩ মাস - ১ বছর ☐      ১ - ৫ বছর ☐      ৫ বছরের বেশি ☐

আপনি কি এই উপসর্গটির জন্যে কোনো চিকিৎসা করাচ্ছেন?      হ্যাঁ ☐      না ☐

যদি উত্তর 'হ্যাঁ' হয়, আপনার ওষুধের নাম লিখুন ও দিনে/সপ্তাহে কতটা ওষুধ খাচ্ছেন জানান: .....

ওষুধের পরিমাণ যদি কমানো হয়:      গুরুত্বপূর্ণ নয় ☐      কিছুটা গুরুত্বপূর্ণ ☐      খুব গুরুত্বপূর্ণ ☐      অপ্রাসঙ্গিক ☐

যদি উত্তর 'না' হয় এবং যদি ওষুধ বন্ধ রাখা হয়:

গুরুত্বপূর্ণ নয় ☐      কিছুটা গুরুত্বপূর্ণ ☐      খুব গুরুত্বপূর্ণ ☐      অপ্রাসঙ্গিক ☐

অংশগ্রহণের জন্যে ধন্যবাদ। অনুগ্রহ করে দেখে নিন যে প্রত্যেক প্রশ্নের উত্তর দিয়েছেন কিনা।

রোগীর স্বাক্ষর

ডাক্তারের স্বাক্ষর

MYMOP-2 (Follow-up) Bengali version

রোগীর নাম:

বয়স:

রেজিস্ট্রেশন নং:

তারিখ:

**নিদেশিকা** গত সপ্তাহে আপনার নিম্নলিখিত সমস্যাগুলির তীব্রতা কতটা ছিল, উপযুক্ত সংখ্যায় গোল দাগ দিয়ে তা নির্দেশ করুন।

|                      |             |   |   |   |   |   |              |
|----------------------|-------------|---|---|---|---|---|--------------|
| উপসর্গ ১:            | ০           | ১ | ২ | ৩ | ৪ | ৫ | ৬            |
| .....                | সবথেকে ভালো |   |   |   |   |   | সবথেকে খারাপ |
| .....                | যা হতে পারে |   |   |   |   |   | যা হতে পারে  |
|                      |             |   |   |   |   |   |              |
| উপসর্গ ২:            | ০           | ১ | ২ | ৩ | ৪ | ৫ | ৬            |
| .....                | সবথেকে ভালো |   |   |   |   |   | সবথেকে খারাপ |
| .....                | যা হতে পারে |   |   |   |   |   | যা হতে পারে  |
|                      |             |   |   |   |   |   |              |
| কাজকর্ম:             | ০           | ১ | ২ | ৩ | ৪ | ৫ | ৬            |
| .....                | সবথেকে ভালো |   |   |   |   |   | সবথেকে খারাপ |
| .....                | যা হতে পারে |   |   |   |   |   | যা হতে পারে  |
|                      |             |   |   |   |   |   |              |
| সবমিলিয়ে ভালো থাকা: | ০           | ১ | ২ | ৩ | ৪ | ৫ | ৬            |
| .....                | সবথেকে ভালো |   |   |   |   |   | সবথেকে খারাপ |
| .....                | যা হতে পারে |   |   |   |   |   | যা হতে পারে  |

যদি নতুন করে কোনো উপসর্গ এসে থাকে, তাহলে তার তীব্রতা কতটা?

|           |             |   |   |   |   |   |              |
|-----------|-------------|---|---|---|---|---|--------------|
| উপসর্গ ৩: | ০           | ১ | ২ | ৩ | ৪ | ৫ | ৬            |
| .....     | সবথেকে ভালো |   |   |   |   |   | সবথেকে খারাপ |
| .....     | যা হতে পারে |   |   |   |   |   | যা হতে পারে  |

আপনি কি এই উপসর্গটির জন্যে কোনো চিকিৎসা করাচ্ছেন?      হ্যাঁ ☐      না ☐

যদি উত্তর 'হ্যাঁ' হয়, আপনার ওষুধের নাম লিখুন ও দিনে/সপ্তাহে কতটা ওষুধ খাচ্ছেন জানান: .....

হতে পারে আপনি যে চিকিৎসা করাচ্ছেন, সেটি ছাড়া অন্য কিছু আপনার উপসর্গগুলিকে প্রভাবিত করছে। যদি আপনার এইরকম কিছু গুরুত্বপূর্ণ মনে হয়ে থাকে (যেমন আপনি নিজের জীবনে যা কিছু পরিবর্তন এনেছেন), তা লিখে জানান।

.....

.....

অংশগ্রহণের জন্যে ধন্যবাদ । অনুগ্রহ করে দেখে নিন যে প্রত্যেক প্রশ্নের উত্তর দিয়েছেন কিনা ।

.....

.....

রোগীর স্বাক্ষর

ডাক্তারের স্বাক্ষর

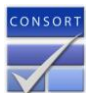**CONSORT 2010 checklist of information to include when reporting a randomised trial\***

| Section/Topic                    | Item No | Checklist item                                                                                                                                                                              | Reported on page No |
|----------------------------------|---------|---------------------------------------------------------------------------------------------------------------------------------------------------------------------------------------------|---------------------|
| <b>Title and abstract</b>        |         |                                                                                                                                                                                             |                     |
|                                  | 1a      | Identification as a randomised trial in the title                                                                                                                                           | 1                   |
|                                  | 1b      | Structured summary of trial design, methods, results, and conclusions (for specific guidance see CONSORT for abstracts)                                                                     | 1-2                 |
| <b>Introduction</b>              |         |                                                                                                                                                                                             |                     |
| Background and objectives        | 2a      | Scientific background and explanation of rationale                                                                                                                                          | 2-3                 |
|                                  | 2b      | Specific objectives or hypotheses                                                                                                                                                           | 3                   |
| <b>Methods</b>                   |         |                                                                                                                                                                                             |                     |
| Trial design                     | 3a      | Description of trial design (such as parallel, factorial) including allocation ratio                                                                                                        | 4                   |
|                                  | 3b      | Important changes to methods after trial commencement (such as eligibility criteria), with reasons                                                                                          | NA                  |
| Participants                     | 4a      | Eligibility criteria for participants                                                                                                                                                       | 4-5                 |
|                                  | 4b      | Settings and locations where the data were collected                                                                                                                                        | 4                   |
| Interventions                    | 5       | The interventions for each group with sufficient details to allow replication, including how and when they were actually administered                                                       | 5-6                 |
| Outcomes                         | 6a      | Completely defined pre-specified primary and secondary outcome measures, including how and when they were assessed                                                                          | 6                   |
|                                  | 6b      | Any changes to trial outcomes after the trial commenced, with reasons                                                                                                                       | NA                  |
| Sample size                      | 7a      | How sample size was determined                                                                                                                                                              | 6-7                 |
|                                  | 7b      | When applicable, explanation of any interim analyses and stopping guidelines                                                                                                                | NA                  |
| Randomisation:                   |         |                                                                                                                                                                                             |                     |
| Sequence generation              | 8a      | Method used to generate the random allocation sequence                                                                                                                                      | 7                   |
|                                  | 8b      | Type of randomisation; details of any restriction (such as blocking and block size)                                                                                                         | 7                   |
| Allocation concealment mechanism | 9       | Mechanism used to implement the random allocation sequence (such as sequentially numbered containers), describing any steps taken to conceal the sequence until interventions were assigned | 7                   |
| Implementation                   | 10      | Who generated the random allocation sequence, who enrolled participants, and who assigned participants to interventions                                                                     | 7                   |
| Blinding                         | 11a     | If done, who was blinded after assignment to interventions (for example, participants, care providers, those                                                                                | 7                   |

|                                                      |     |                                                                                                                                                   |             |
|------------------------------------------------------|-----|---------------------------------------------------------------------------------------------------------------------------------------------------|-------------|
|                                                      |     | assessing outcomes) and how                                                                                                                       |             |
| Statistical methods                                  | 11b | If relevant, description of the similarity of interventions                                                                                       | 5-6         |
|                                                      | 12a | Statistical methods used to compare groups for primary and secondary outcomes                                                                     | 7-8         |
|                                                      | 12b | Methods for additional analyses, such as subgroup analyses and adjusted analyses                                                                  | NA          |
| <b>Results</b>                                       |     |                                                                                                                                                   |             |
| Participant flow (a diagram is strongly recommended) | 13a | For each group, the numbers of participants who were randomly assigned, received intended treatment, and were analysed for the primary outcome    | 8           |
|                                                      | 13b | For each group, losses and exclusions after randomisation, together with reasons                                                                  | 8           |
| Recruitment                                          | 14a | Dates defining the periods of recruitment and follow-up                                                                                           | 8           |
|                                                      | 14b | Why the trial ended or was stopped                                                                                                                | NA          |
| Baseline data                                        | 15  | A table showing baseline demographic and clinical characteristics for each group                                                                  | Tables 1, 2 |
| Numbers analysed                                     | 16  | For each group, number of participants (denominator) included in each analysis and whether the analysis was by original assigned groups           | 9           |
| Outcomes and estimation                              | 17a | For each primary and secondary outcome, results for each group, and the estimated effect size and its precision (such as 95% confidence interval) | 9           |
|                                                      | 17b | For binary outcomes, presentation of both absolute and relative effect sizes is recommended                                                       | NA          |
| Ancillary analyses                                   | 18  | Results of any other analyses performed, including subgroup analyses and adjusted analyses, distinguishing pre-specified from exploratory         | NA          |
| Harms                                                | 19  | All important harms or unintended effects in each group (for specific guidance see CONSORT for harms)                                             | 9           |
| <b>Discussion</b>                                    |     |                                                                                                                                                   |             |
| Limitations                                          | 20  | Trial limitations, addressing sources of potential bias, imprecision, and, if relevant, multiplicity of analyses                                  | 10-11       |
| Generalizability                                     | 21  | Generalizability (external validity, applicability) of the trial findings                                                                         | 11          |
| Interpretation                                       | 22  | Interpretation consistent with results, balancing benefits and harms, and considering other relevant evidence                                     | 11          |
| <b>Other information</b>                             |     |                                                                                                                                                   |             |
| Registration                                         | 23  | Registration number and name of trial registry                                                                                                    | 2, 4        |
| Protocol                                             | 24  | Where the full trial protocol can be accessed, if available                                                                                       | 2, 4        |
| Funding                                              | 25  | Sources of funding and other support (such as supply of drugs), role of funders                                                                   | 12          |

\*We strongly recommend reading this statement in conjunction with the CONSORT 2010 Explanation and Elaboration for important clarifications on all the items. If relevant, we also recommend reading CONSORT extensions for cluster randomised trials, non-inferiority and equivalence trials, non-pharmacological treatments, herbal interventions, and pragmatic trials. Additional extensions are forthcoming: for those and for up to date references relevant to this checklist, see [www.consort-statement.org](http://www.consort-statement.org).



# Supplementary File - 8

## RedHot checklist of information to include when reporting randomised trials of homeopathy

| Item | Treatment (CONSORT item number) | Description                                                                                                                                                                                                                                                                  | Reported on page No                                                                          |
|------|---------------------------------|------------------------------------------------------------------------------------------------------------------------------------------------------------------------------------------------------------------------------------------------------------------------------|----------------------------------------------------------------------------------------------|
| 1    | Rationale (2)                   | <i>Type of homeopathy</i><br>Individualized<br>Formula<br>Isopathy<br><i>Evidence base</i><br>Sources, references                                                                                                                                                            | <hr/> 2-4<br>-<br>-<br><hr/> 2-4                                                             |
| 2    | Participants (3)                | Knowledge condition<br>Baseline health definition in proving                                                                                                                                                                                                                 | <hr/> 2-4<br><hr/> NA                                                                        |
| 3    | Medications (4)                 | <i>Manufacture</i><br>▪ Manufacturer, Pharmacopoeia (or process), references<br>▪ Potency and scale<br>▪ Dilution method<br><i>Nomenclature</i><br>▪ Individualized: list or frequency table<br>▪ Formula: constituents, trade name<br><i>Dosage</i><br>▪ Dose, timing, form | <hr/> 5-6<br><hr/> 5-6<br><hr/> 5-6<br><hr/><br><hr/> 10<br><hr/> NA<br><hr/> 4<br><hr/> 5-6 |
| 4    | Consultations (4)               | Setting<br>Clinical history detail<br>Duration, frequency<br>Number needed to agree prescription<br>Group process or expert consultation<br>Confidence in prescriptions                                                                                                      | <hr/><br><hr/> 5<br><hr/> 5<br><hr/> 5<br><hr/> 5<br><hr/> 5                                 |
| 5    | Practitioners (4)               | Number in study<br>Experience, accreditation, qualifications<br>Current schools or styles of homeopathy                                                                                                                                                                      | <hr/> 5-6<br><hr/> 5-6<br><hr/> 5-6                                                          |

|   |                           |                                        |     |
|---|---------------------------|----------------------------------------|-----|
| 6 | Co-interventions (4)      | <i>Included</i>                        |     |
|   |                           | Rationale, intended effect, references | 6-7 |
|   |                           | Duration, frequency                    | 6-7 |
|   |                           | <i>Excluded</i>                        |     |
| 7 | Control interventions (4) | Stopping of mainstream interventions   | NA  |
|   |                           | Antidotes                              | NA  |
|   |                           | <i>Active</i>                          |     |
|   |                           | Rationale, references                  | 6-7 |
|   |                           | <i>Placebo</i>                         | -   |
| 8 | Adverse events (8)        | Manufacturing process                  | NA  |
|   |                           | Aggravations                           | 10  |

Statement, to be included with checklist:

These guidelines are intended as a supplement to, not a substitute for, the CONSORT Statement, to improve the reporting of homeopathic treatments. We strongly recommend that reports of clinical trials of homeopathy follow the CONSORT guidelines, particularly the flowchart.

The points above are specific to homeopathy. All points refer to controlled clinical trials, all but item 7 to uncontrolled outcome studies.

## Supplementary File - 9

### Indications of prescribed medicines

#### 1. **Benzoic acid:**

- Tearing in joints with clear urine, old nodes become painful. As the pain abates, palpitation sets in, ceasing only when pain increases.
- Gout going from left to right or commencing in great toe.
- Urine is of offensive urinous odor, highly intensified, depositing reddish cloudy sediment.
- Prone to dwell on unpleasant things of the past. Omits words in writing.

#### 2. **Bryonia alba:**

- Best adapted to the persons of gouty or rheumatic diathesis; prone to so-called bilious attacks. Rheumatic pains and swellings. Hot swelling of feet. Joints red, swollen, hot, with stitches and tearing. Every spot is painful on pressure. Pain produced is stitching and tearing, agg. by motion, touch, amel. by absolute rest, lying on painful side.
- Affects the right side.
- Mucous membranes are all dry with thirst for large quantities of water.
- Urine dark and scanty.
- Complains apt to develop slowly, especially appear during warm weather after cold days.
- Tongue white down the center.
- Patient is unbearably cross. Exceedingly irritable, with ailments form chagrin, mortification, anger, violence, with chilliness and coldness.

#### 3. **Colchicum autumnale:**

- Adapted to the rheumatic, gouty, uric acid diathesis. Gout in persons of vigorous constitutions. Gout attacking many joints; shifting from one to another, with burning and tearing pains. The joint becomes inflamed, dark red, hot and intensely painful and swollen, patient nearly beside himself with agony. Tearing pains, agg. in the evening, at night, and from touch. Stubbing the toe hurts exceedingly. Inflammation of the great toe, gout in the heel, cannot bear to have it touched or moved. Edema and coldness of legs and feet, with weariness, heaviness and inability to move.
- Urine acid, dark and scanty.
- Pain goes from left to right, light or superficial during warm weather, affects the bones and deeper tissues, when air is cold.
- The smell of food nauseates.
- Ailments from grief or misdeed of others. Ailments from any external impressions, light, noise, strong odors, contact, bad manners, make him almost beside himself.

#### 4. **Ledum palustre:**

- Adapted to rheumatic, gouty diathesis; constitutions abused by alcohol.

- Edematous swelling of joint, which may feel cold to touch, but not cold subjectively to patient; affects chiefly left shoulder and right hip joint. Begins in lower limbs and ascends. Habitual gout in the articulations of hands and feet. Ball of great toe swollen and painful. Gouty nodosities in joints. Fine tearing pain in toes.
- Pain are sticking, tearing, throbbing; rheumatic pains are agg. by motion, night, by warmth of bed; amel. only when holding feet in ice-cold water.

**5. Lycopodium clavatum:**

- Uric acid diathesis with ailments develop gradually and failure of digestive powers.
- Tophi; nocturnal pains, agg. by heat. Tearing in the limbs at night and on alternate days, agg. at rest. Joints rigid painful and numb. Finger joints inflamed with arthritis nodes. Swelling of the dorsa of the feet, amel. by warmth.
- Red sand in the urine, must rise often at night to pass urine.
- For persons intellectually keen, but physically weak; upper part of the body emaciated. Lower part semi-dropsical.
- Sour eructation; frequent belching without relief. Symptoms move from right to left, and worse from about 4 to 8 pm.
- Ailments from fright, anger, mortification, or vexation with reserved displeasure.
- Avaricious, greed, miserly, pusillanimous, irritable and peevish. Loss of self-confidence.
